# Supplementary material for: “It is better to die”: experiences of traditional health practitioners within the HIV treatment as prevention trial communities in rural South Africa (ANRS 12249 TasP trial)
Source: PubMed Central journal article supplement (PMC5096678; doi:10.1080/09540121.2016.1181296), 2016
Supplement: NIHMS70179-supplement-Appendix.pdf [file NIHMS70179-supplement-Appendix.pdf]

**Table A1.** Continued.

| Name                 | Role                                               | Affiliation                                                                                                                                                                                                                                                          |
|----------------------|----------------------------------------------------|----------------------------------------------------------------------------------------------------------------------------------------------------------------------------------------------------------------------------------------------------------------------|
| Deenan Pillay        | Co-PI (South Africa)                               | <ul style="list-style-type: none"> <li>Africa Centre for Population Health, University of KwaZulu-Natal, South Africa</li> <li>Faculty of Medical Sciences, University College London, United Kingdom (UK)</li> </ul>                                                |
| Marie-Louise Newell  | Co-PI (United Kingdom)                             | <ul style="list-style-type: none"> <li>Africa Centre for Population Health University of KwaZulu-Natal, South Africa</li> <li>Faculty of Medicine, University of Southampton, UK</li> </ul>                                                                          |
| <i>Coordinators</i>  |                                                    |                                                                                                                                                                                                                                                                      |
| Collins Iwuji        | Trial Coordinator and HIV Clinician (South Africa) | <ul style="list-style-type: none"> <li>Africa Centre for Population Health, University of KwaZulu-Natal, South Africa</li> <li>Research Department of Infection and Population Health, University College London, UK</li> </ul>                                      |
| Joanna Orne-Gliemann | Trial Coordinator (France)                         | <ul style="list-style-type: none"> <li>Univ. Bordeaux, ISPED, Centre Inserm U1219 Bordeaux Population Health, Bordeaux, France</li> <li>INSERM, ISPED, Centre Inserm U1219 Bordeaux Population Health, Bordeaux, France</li> </ul>                                   |
| <i>Study team</i>    |                                                    |                                                                                                                                                                                                                                                                      |
| Till Bärnighausen    | Health Economics                                   | <ul style="list-style-type: none"> <li>Africa Centre for Population Health, University of KwaZulu-Natal, South Africa</li> <li>Dept of Global Health &amp; Population, Harvard School of Public Health, Harvard Univ. Boston, USA</li> </ul>                         |
| Eric Balestre        | Epidemiology and Biostatistics                     | <ul style="list-style-type: none"> <li>Univ. Bordeaux, ISPED, Centre Inserm U1219 Bordeaux Population Health, Bordeaux, France</li> <li>INSERM, ISPED, Centre Inserm U1219 Bordeaux Population Health, Bordeaux, France</li> </ul>                                   |
| Sylvie Boyer         | Health Economics                                   | <ul style="list-style-type: none"> <li>INSERM, UMR912 (SESSTIM), Marseille, France</li> <li>Aix Marseille Université, UMR_S912, IRD, Marseille, France</li> <li>ORS PACA, Observatoire Régional de la Santé Provence-Alpes-Côte d'Azur, Marseille, France</li> </ul> |
| Alexandra Calmy      | Adult Medicine                                     | <ul style="list-style-type: none"> <li>Service des maladies infectieuses, Hôpital Universitaire de Geneve, Genève, Switzerland</li> </ul>                                                                                                                            |
| Vincent Calvez       | Virology                                           | <ul style="list-style-type: none"> <li>Department of virology, Hôpital Pitié-Salpêtrière, Paris, France</li> </ul>                                                                                                                                                   |

**Appendix:****Table A1.** Composition of the ANRS 12249 TasP Study Group (as of January 2016).

| Name                 | Role           | Affiliation                                                                                                                                                                                                                        |
|----------------------|----------------|------------------------------------------------------------------------------------------------------------------------------------------------------------------------------------------------------------------------------------|
| <i>Investigators</i> |                |                                                                                                                                                                                                                                    |
| François Dabis       | Co-PI (France) | <ul style="list-style-type: none"> <li>Univ. Bordeaux, ISPED, Centre Inserm U1219 Bordeaux Population Health, Bordeaux, France</li> <li>INSERM, ISPED, Centre Inserm U1219 Bordeaux Population Health, Bordeaux, France</li> </ul> |

(Continued)

(Continued)

**Table A1.** Continued.

| Name                    | Role                         | Affiliation                                                                                                                                                                                                                                                                                                                                        |
|-------------------------|------------------------------|----------------------------------------------------------------------------------------------------------------------------------------------------------------------------------------------------------------------------------------------------------------------------------------------------------------------------------------------------|
| Rosemary Dray-Spira     | Social Sciences              | <ul style="list-style-type: none"> <li>INSERM U1018, CESP, Epidemiology of Occupational and Social Determinants of Health, Villejuif, France</li> <li>University of Versailles Saint-Quentin, UMRS 1018, Villejuif, France</li> </ul>                                                                                                              |
| Kobus Herbst            | Data Management              | <ul style="list-style-type: none"> <li>Africa Centre for Population Health, University of KwaZulu-Natal, South Africa</li> </ul>                                                                                                                                                                                                                   |
| John Imrie              | Social Sciences              | <ul style="list-style-type: none"> <li>Africa Centre for Population Health, University of KwaZulu-Natal, South Africa</li> <li>Centre for Sexual Health and HIV Research, Research Department of Infection and Population, Faculty of Population Health Sciences, University College London, London, UK</li> </ul>                                 |
| Joseph Larmarange       | Social Sciences              | <ul style="list-style-type: none"> <li>Centre Population &amp; Développement (Ceped UMR 196 UPD IRD), Institut de Recherche pour le Développement, Paris, France</li> <li>Africa Centre for Population Health, University of KwaZulu-Natal, South Africa</li> </ul>                                                                                |
| France Lert             | Social Sciences              | <ul style="list-style-type: none"> <li>INSERM U1018, CESP, Epidemiology of Occupational and Social Determinants of Health, Villejuif, France</li> <li>University of Versailles Saint-Quentin, UMRS 1018, Villejuif, France</li> </ul>                                                                                                              |
| Thembisa Makowa         | Field Operations             | <ul style="list-style-type: none"> <li>Africa Centre for Population Health, University of KwaZulu-Natal, South Africa</li> </ul>                                                                                                                                                                                                                   |
| Anne-Geneviève Marcelin | Virology                     | <ul style="list-style-type: none"> <li>Department of virology, Hôpital Pitié-Salpêtrière, Paris, France</li> </ul>                                                                                                                                                                                                                                 |
| Nuala McGrath           | Epidemiology/Social Sciences | <ul style="list-style-type: none"> <li>Faculty of Medicine and Faculty of Human, Social and Mathematical Sciences, University of Southampton, UK</li> <li>Africa Centre for Population Health, University of KwaZulu-Natal, South Africa</li> <li>Research Department of Infection and Population Health, University College London, UK</li> </ul> |
| Nonhlanhla Okesola      | Nurse Manager                | <ul style="list-style-type: none"> <li>Africa Centre for Population Health, University of KwaZulu-Natal, South Africa</li> </ul>                                                                                                                                                                                                                   |

(Continued)

**Table A1.** Continued.

| Name                 | Role                           | Affiliation                                                                                                                                                                                                                                                                 |
|----------------------|--------------------------------|-----------------------------------------------------------------------------------------------------------------------------------------------------------------------------------------------------------------------------------------------------------------------------|
| Tulio de Oliveira    | Bioinformatics                 | <ul style="list-style-type: none"> <li>Africa Centre for Population Health, University of KwaZulu-Natal, South Africa</li> </ul>                                                                                                                                            |
| Melanie Plazy        | Epidemiology/Social Sciences   | <ul style="list-style-type: none"> <li>Univ. Bordeaux, ISPED, Centre Inserm U1219 Bordeaux Population Health, Bordeaux, France</li> <li>INSERM, ISPED, Centre Inserm U1219 Bordeaux Population Health, Bordeaux, France</li> </ul>                                          |
| Camelia Protopopescu | Statistics/Economist           | <ul style="list-style-type: none"> <li>INSERM, UMR912 (SESSTIM), Marseille, France</li> <li>Aix Marseille Université, UMR_S912, IRD, Marseille, France</li> <li>ORS PACA, Observatoire Régional de la Santé Provence-Alpes-Côte d'Azur, Marseille, France</li> </ul>        |
| Luis Sagaon-Teyssier | Health Economics               | <ul style="list-style-type: none"> <li>INSERM, UMR912 (SESSTIM), Marseille, France</li> <li>Aix Marseille Université, UMR_S912, IRD, Marseille, France</li> <li>ORS PACA, Observatoire Régional de la Santé Provence-Alpes-Côte d'Azur, Marseille, France</li> </ul>        |
| Bruno Spire          | Health Economics               | <ul style="list-style-type: none"> <li>INSERM, UMR912 (SESSTIM), 13006, Marseille, France</li> <li>Aix Marseille Université, UMR_S912, IRD, Marseille, France</li> <li>ORS PACA, Observatoire Régional de la Santé Provence-Alpes-Côte d'Azur, Marseille, France</li> </ul> |
| Frank Tanser         | Epidemiology and Biostatistics | <ul style="list-style-type: none"> <li>Africa Centre for Population Health, University of KwaZulu-Natal, South Africa</li> </ul>                                                                                                                                            |
| Rodolphe Thiébaud    | Epidemiology and Biostatistics | <ul style="list-style-type: none"> <li>Univ. Bordeaux, ISPED, Centre Inserm U1219 Bordeaux Population Health, Bordeaux, France</li> <li>INSERM, ISPED, Centre Inserm U1219 Bordeaux Population Health, Bordeaux, France</li> </ul>                                          |
| Thembelile Zuma      | Psychology/Social Sciences     | <ul style="list-style-type: none"> <li>Africa Centre for Population Health, University of KwaZulu-Natal, South Africa</li> </ul>                                                                                                                                            |

## Scientific advisory board

- Chair: Bernard Hirschel (Switzerland)
- International experts: Xavier Anglaret (Ivory Coast), Hoosen Coovadia (South Africa), Alpha Diallo

(France), Bruno Giraudeau (France), Jean-Michel Molina (France), Lynn Morris (South Africa), François Venter (South Africa), Sibongile Zungu (South Africa)

- Community representatives: Eric Fleutelot (France), Eric Goemaere (South Africa), Calice Talom (Cameroon)
- Sponsor representatives (ANRS): Brigitte Bazin, Claire Rekecewicz

- Pharmaceutical company representatives: Golriz Pahlavan-Grumel (MSD), Alice Jacob (Gilead)

#### Data safety and monitoring board

- Chair: Patrick Yeni (France)
- Members: Sinead Delany-Moretlwe (South Africa), Nathan Ford (South Africa), Catherine Hankins (Netherlands), Helen Weiss (UK)
